# Supplementary material for: Assessing the atmospheric fate of trifluoroacetaldehyde (CF3CHO) and its potential as a new source of fluoroform (HFC-23) using the AtChem2 box model
Source: Royal Society of Chemistry journal article supplement (doi:10.1039/d3ea00120b), 2023-01-01
Supplement: d3ea00120b1.pdf [file d3ea00120b1.pdf]

## Supplementary material

Maria Paula Pérez-Peña,<sup>\*a</sup> Jenny A. Fisher,<sup>b‡</sup> Christopher Hansen,<sup>a</sup> and Scott H. Kable<sup>a</sup>

September 27, 2023

## CF<sub>3</sub>CHO absorption cross section

Figure 1 shows the CF<sub>3</sub>CHO absorption cross sections from 200-400 nm at 298 K reported by Sellevag *et al.* Sellevag et al., 2004.

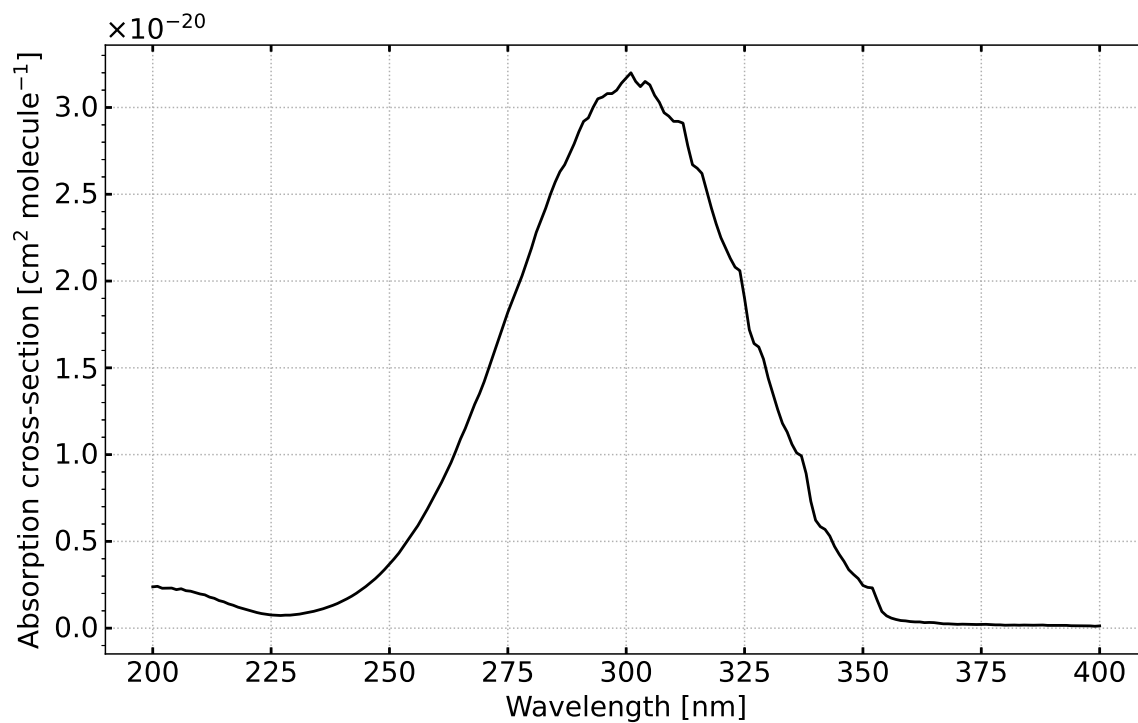

Figure 1: Absorption cross-section for CF<sub>3</sub>CHO at 298 K as a function of wavelength, as reported by Sellevag et al. (2004).

## Henry’s Law parameters

Table 1 shows Henry’s Law parameters for a series of simple oxygenated organic compounds. Acids and other species that are ionised in solution are excluded. Also recorded are the same compounds with a degree of fluorine substitution, especially substitution of a methyl group ( $\text{CH}_3$ ) with a trifluoromethyl group ( $\text{CF}_3$ ). In every case, replacing a  $\text{CH}_3$  group with  $\text{CF}_3$  reduces  $H^{\text{cp}}$  by about one to two orders of magnitude, *i.e.* increasing fluorination decreases solubility. In this work, we bracket  $H^{\text{cp}}(\text{CF}_3\text{CHO})$  by the values for  $\text{CH}_3\text{CHO}$  and  $\text{CF}_3\text{CFO}$ .

Table 1: Table of Henry’s law solubility constant ( $H^{\text{cp}}$ ), and the temperature dependence of  $H^{\text{cp}}$  ( $\frac{d \ln H^{\text{cp}}}{d(1/T)}$ ) for some oxgenated organic species and their fluorine substituted counterparts. Values obtained from Sander (2015) unless specified otherwise.

| Compound                                                         | Name                              | $H^{\text{cp}}$<br>[mol m <sup>-3</sup> Pa <sup>-1</sup> ] | $H^{\text{cp}}$<br>[M atm <sup>-1</sup> ] | $\frac{d(\ln H^{\text{cp}})}{d(1/T)}$<br>[K] |
|------------------------------------------------------------------|-----------------------------------|------------------------------------------------------------|-------------------------------------------|----------------------------------------------|
| HCHO                                                             | methanal (formaldehyde)           | 32.0                                                       | 3240                                      | 7100                                         |
| FCHO                                                             | formyl fluoride                   | 0.030                                                      | 3.0                                       | <sup>-b</sup>                                |
| FCFO                                                             | carbonyl fluoride                 | 0.01 – 0.35                                                | 1 – 36                                    | <sup>-b</sup>                                |
| <b>CH<sub>3</sub>CHO</b>                                         | <b>ethanal (acetaldehyde)</b>     | 0.13                                                       | 13.2                                      | 5900                                         |
| <b>CF<sub>3</sub>CHO</b>                                         | <b>trifluoroethanal</b>           | <sup>-b</sup>                                              | <sup>-b</sup>                             | <sup>-b</sup>                                |
| <b>CF<sub>3</sub>CFO</b>                                         | <b>trifluoroacetyl fluoride</b>   | 0.0095 – 0.03                                              | 0.96 – 3 <sup>a</sup>                     | <sup>-b</sup>                                |
| CH <sub>3</sub> COCH <sub>3</sub>                                | propanone (acetone)               | 27                                                         | 2736                                      | 5500                                         |
| CF <sub>3</sub> COCH <sub>3</sub>                                | 1,1,1-trifluoro-2-propanone       | 1.4                                                        | 142                                       | 8900                                         |
| CH <sub>3</sub> CH <sub>2</sub> OH                               | ethanol                           | 1.9                                                        | 193                                       | 6400                                         |
| CF <sub>3</sub> CH <sub>2</sub> OH                               | 2,2,2-trifluoroethanol            | 0.47                                                       | 47.6                                      | 6200                                         |
| CH <sub>3</sub> CHOHCH <sub>3</sub>                              | 2-propanol (isopropanol)          | 1.30                                                       | 132                                       | 7500                                         |
| CF <sub>3</sub> CHOHCH <sub>3</sub>                              | 1,1,1-trifluoro-2-propanol        | 0.45                                                       | 45.6                                      | 6300                                         |
| CF <sub>3</sub> CHOHCF <sub>3</sub>                              | 1,1,1,3,3,3-hexafluoro-2-propanol | 0.24                                                       | 24                                        | 6700                                         |
| CH <sub>3</sub> CH <sub>2</sub> OCH <sub>2</sub> CH <sub>3</sub> | diethyl ether                     | 0.011                                                      | 1.1                                       | 3900 – 6600                                  |
| CH <sub>3</sub> CH <sub>2</sub> OCH <sub>2</sub> CF <sub>3</sub> | ethyl 2,2,2-trifluoroethyl ether  | 0.00072                                                    | 0.073                                     | <sup>-b</sup>                                |
| CH <sub>3</sub> CH <sub>2</sub> O(C=O)H                          | ethyl methanoate (ethyl formate)  | 0.034                                                      | 3.5                                       | 4600                                         |
| CF <sub>3</sub> CH <sub>2</sub> O(C=O)H                          | 2,2,2-trifluoroethyl methanoate   | 0.0054                                                     | 0.55                                      | 4700                                         |

<sup>a</sup> Obtained from Burkholder et al. (2015)

<sup>b</sup> Not measured

<sup>c</sup> Obtained from Kim et al. (2023)

## Acetaldehyde deposition

Figure 2 shows the resulting temporally averaged dry deposition velocities obtained for acetaldehyde. The highest global dry deposition velocity value modelled for acetaldehyde was  $0.7 \text{ cm s}^{-1}$  for both modelling periods. As expected, there was a marked seasonality in the estimates, mostly driven by the presence of snow in the Northern Hemisphere winter. For January, the acetaldehyde dry deposition velocities in the Northern Hemisphere did not exceed  $0.23 \text{ cm s}^{-1}$ , and the maximum dry deposition value was found to occur in equatorial regions. On the other hand, for June, the maximum dry deposition velocities of  $0.7 \text{ cm s}^{-1}$  were observed at higher Northern Hemisphere latitudes as well as in equatorial regions.

The acetaldehyde dry deposition velocities from GEOS-Chem are lower at tropical and equatorial regions than the observed and modelled values reported by Müller et al. (2019). Müller et al. (2019) report dry deposition velocities for two dominant plant functional types, tropical rainforest and pine plantation, ranging between  $1.0 \text{ cm s}^{-1}$  and  $2.3 \text{ cm s}^{-1}$ . On the other hand, our predictions are comparable to the modelled acetaldehyde dry deposition values over North America reported by Zhang et al. (2023). Averaged across two modelled years, the mean acetaldehyde dry deposition value for North America determined by Zhang et al. (2023) was  $0.065 \text{ cm s}^{-1}$ , while the maximum reported value was  $0.56 \text{ cm s}^{-1}$ . In Figure 2b, it can be observed that for June, our modelled dry deposition ranged from  $\sim 0.2 \text{ cm s}^{-1}$  to  $\sim 0.6 \text{ cm s}^{-1}$  over North America. We considered our acetaldehyde dry deposition velocities to be reasonable and thus suitable to be used as a reference for  $\text{CF}_3\text{CHO}$ .

a) January.  $H^{cp} = 13.17 \text{ M atm}^{-1}$ ,  $f_0 = 1$

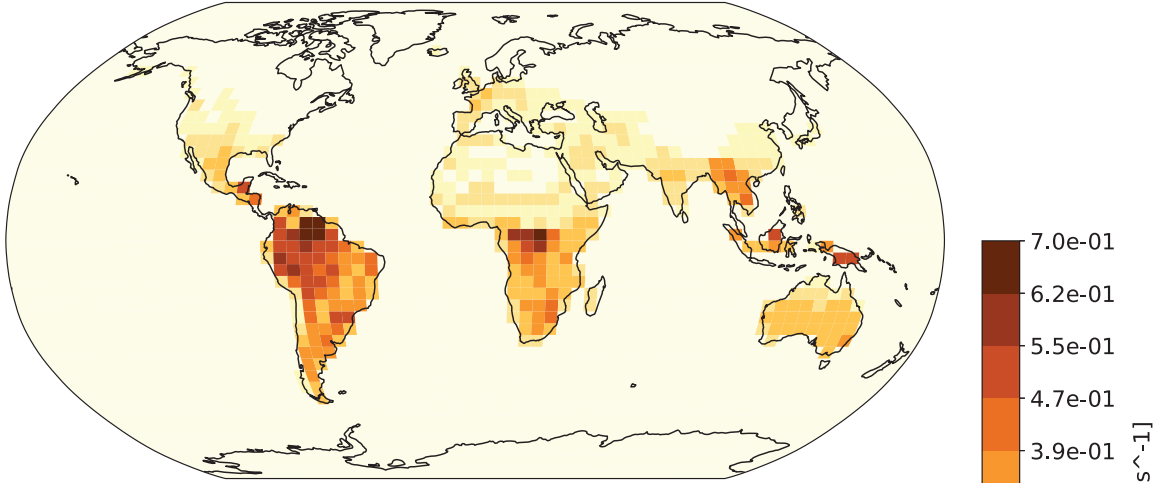

b) June.  $H^{cp} = 13.17 \text{ M atm}^{-1}$ ,  $f_0 = 1$

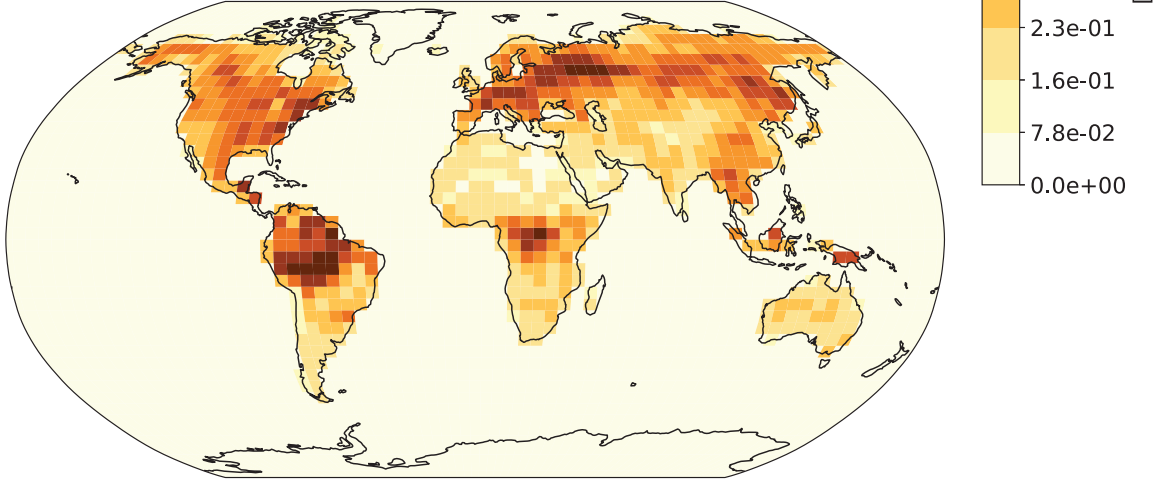

Figure 2: Average monthly dry deposition velocities for acetaldehyde modelled with GEOS-Chem for a) January b) June 2014

## Modelled $\text{CF}_3\text{CHO}$ deposition velocities for January 2014

Figure 3 complements the figure on dry deposition velocities for  $\text{CF}_3\text{CHO}$  in June 2014 shown in the main text (Figure 3).

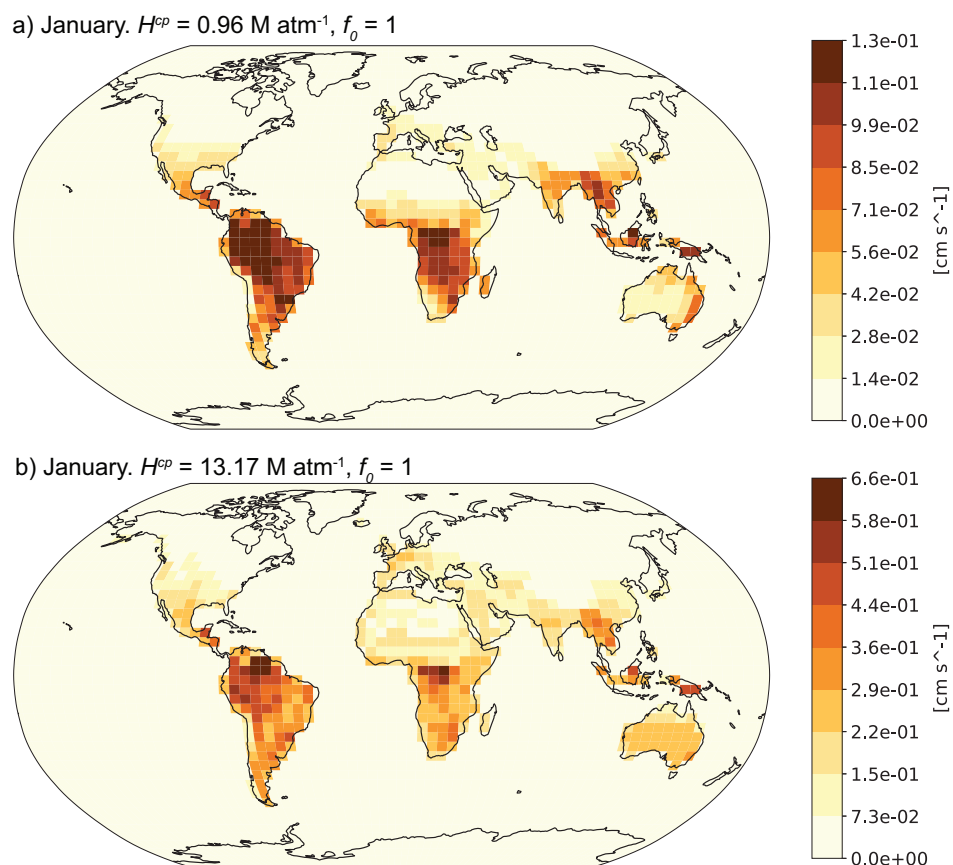

Figure 3: Average monthly dry deposition velocities determined using GEOS-Chem for  $\text{CF}_3\text{CHO}$  for January 2014 using  $H^{\text{cp}}$  of (a)  $0.96 \text{ M atm}^{-1}$  and  $f_0 = 1$  and (b)  $13.17 \text{ M atm}^{-1}$  and  $f_0 = 1$ . The result of using  $H^{\text{cp}} = 0.96 \text{ M atm}^{-1}$  and  $f_0 = 0$  were the same as when using  $f_0 = 1$  (a) and are not shown here.

## Modelled OH<sup>•</sup>

Figure 4 shows the daily average estimates of the OH<sup>•</sup> concentration from the two atmospheric conditions tested in the box model. The urban site had higher concentrations of the OH<sup>•</sup> radical compared to the pristine site. The daytime peak of OH<sup>•</sup> in the pristine atmosphere of  $\sim 4 \times 10^6$  molecules  $\text{cm}^{-3}$  was within the ranges modelled for OH<sup>•</sup> by Whalley et al. (2010) of  $(3.8 - 7.5) \times 10^6$  molecules  $\text{cm}^{-3}$  in this location. For the urban atmosphere, the peak concentration of OH<sup>•</sup> was  $\sim 5 \times 10^6$  molecules  $\text{cm}^{-3}$ , within the modelled OH<sup>•</sup> reported by Whalley et al. (2018) at London of  $(4 - 8) \times 10^6$  molecules  $\text{cm}^{-3}$ . The modelled urban OH<sup>•</sup> peak is also broader in time than pristine atmosphere. Because the urban modelled atmosphere is located at a higher latitude than for the pristine atmosphere, the broader OH<sup>•</sup> peak reflects a longer daylight period. These two features of the urban site, i.e., a higher and broader OH<sup>•</sup> peak, result in faster consumption of HFO-1234ze and also CF<sub>3</sub>CHO in the urban atmosphere.

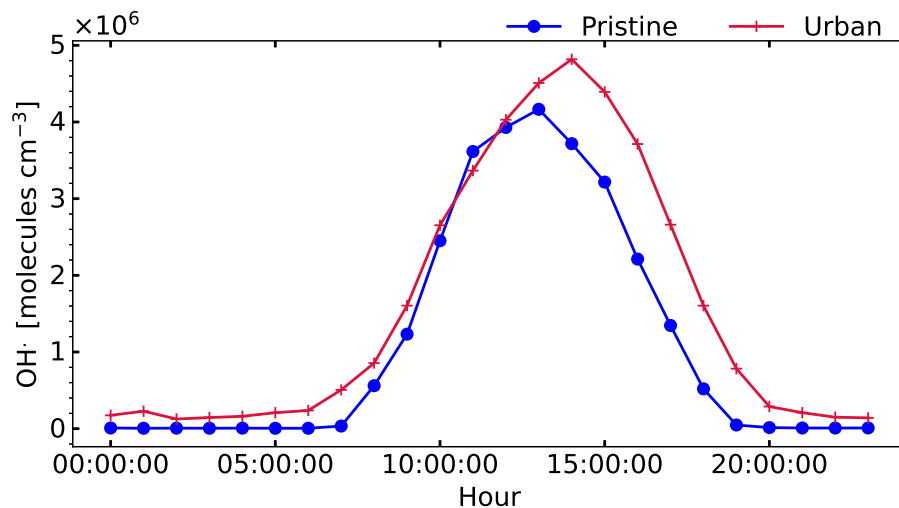

Figure 4: Hourly average OH<sup>•</sup> modelled concentration in AtChem2 for the urban (*GU15\_uqy\_ndep* scenario red line with crosses) and pristine (*GP15\_uqy\_ndep* scenario blue line with circles) atmospheres.

## Diel variation in $\text{CF}_3\text{CHO}$ sinks

The diel variation of the four modelling sinks of  $\text{CF}_3\text{CHO}$ , i.e. OH reaction, photolysis to produce radicals, photolysis to produce FCS-23 and deposition, is shown in Figure 5. Three modelling scenarios are represented.

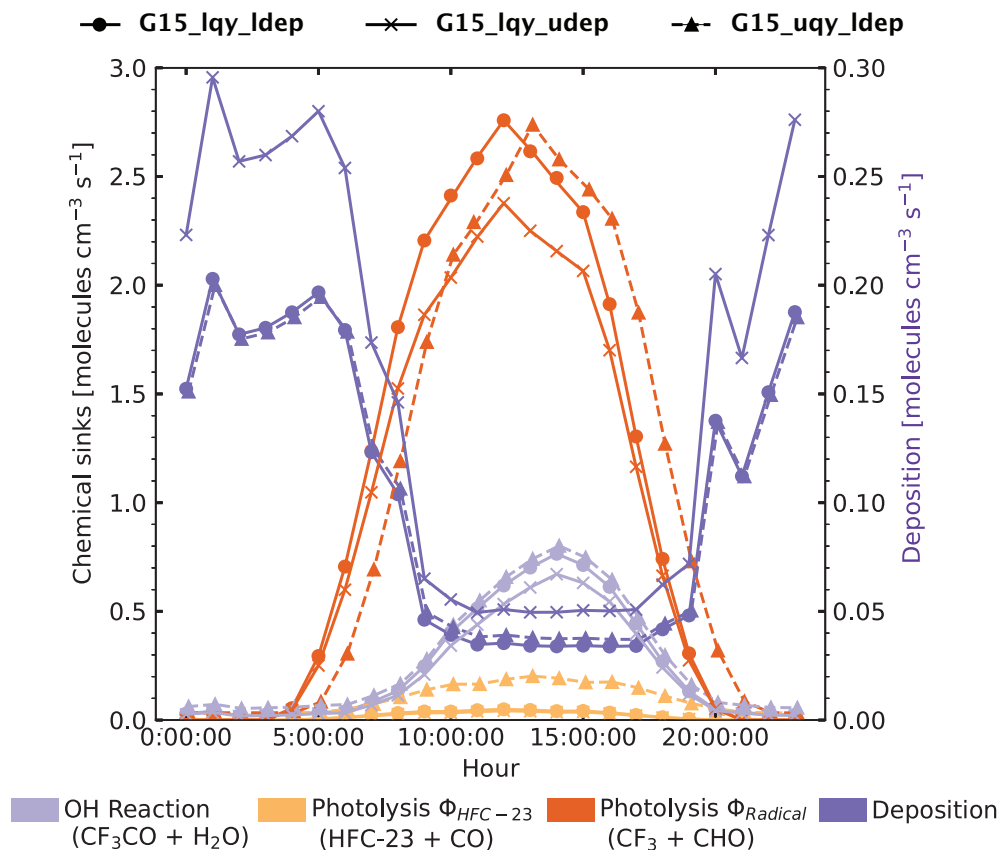

Figure 5: Average daily profile of the chemical and physical sinks of  $\text{CF}_3\text{CHO}$  in the atmosphere for three modelled scenarios: *G15\_lqy\_ldep* (continuous line with circles), *G15\_uqy\_ldep* (dashed line with triangles) and *G15\_lqy\_udep* (continuous line with crosses). For the latter, the deposition values are shown as  $F_{\text{dep}}/10$ .

## References

- Burkholder, J. B., Cox, R. A., & Ravishankara, A. R. (2015). Atmospheric degradation of ozone depleting substances, their substitutes, and related species. *Chemical Reviews*, 115(10), 3704–3759. <https://doi.org/10.1021/cr5006759>
- Kim, S., Chen, J., Cheng, T., Gindulyte, A., He, j., He, S., Li, Q., Shoemaker, B. A., Thiessen, P. A., Yu, B., Zaslavsky, L., Zhang, J., & Bolton, E. E. (2023). Pubchem 2023 update. compound summary. ethyl vinyl ether. *Nucleic Acids Research*, 51(D1), D1373–D1380. <https://doi.org/10.1093/nar/gkac956>
- Müller, J. F., Stavrakou, T., Compernelle, S., & Peeters, J. (2019). Chemistry and deposition in the model of atmospheric composition at global and regional scales using inversion techniques for trace gas emissions (magritte v1.1)-part 1: Chemical mechanism. *Geoscientific Model Development*, 12(6), 2307–2356. <https://doi.org/10.5194/gmd-12-2307-2019>
- Sander, R. (2015). Compilation of henry’s law constants (version 4.0) for water as solvent. *Atmospheric Chemistry and Physics*, 15(8), 4399–4981. <https://doi.org/10.5194/acp-15-4399-2015>
- Sellevag, S. R., Kelly, T., Sidebottom, H., & Nielsen, C. J. (2004). A study of the ir and uv-vis absorption cross-sections, photolysis and oh-initiated oxidation of cf3cho and cf3ch2cho. *Physical Chemistry Chemical Physics*, 6, 1243–1252. <https://doi.org/10.1039/B315941H>
- Whalley, L. K., Furneaux, K. L., Goddard, A., Lee, J. D., Mahajan, A., Oetjen, H., Read, K. A., Kaaden, N., Carpenter, L. J., Lewis, A. C., C. Plane, J. M., Saltzman, E. S., Wiedensohler, A., & Heard, D. E. (2010). The chemistry of oh and ho2 radicals in the boundary layer over the tropical atlantic ocean. *Atmospheric Chemistry and Physics*, 10(4), 1555–1576. <https://doi.org/10.5194/acp-10-1555-2010>
- Whalley, L. K., Stone, D., Dunmore, R., Hamilton, J., Hopkins, J. R., Lee, J. D., Lewis, A. C., Williams, P., Kleffmann, J., Laufs, S., Woodward-Massey, R., & Heard, D. E. (2018). Understanding in situ ozone production in the summertime through radical observations and modelling studies during the clean air for london project (clearflo). *Atmospheric Chemistry and Physics*, 18, 2547–2571. <https://doi.org/10.5194/acp-18-2547-2018>
- Zhang, L., He, Z., Wu, Z., Macdonald, A. M., Brook, J. R., & Kharol, S. (2023). A database of modeled gridded dry deposition velocities for 45 gaseous species and three particle size ranges across north america. *Journal of Environmental Sciences (China)*, 127, 264–272. <https://doi.org/10.1016/j.jes.2022.05.030>
